# Supplementary material for: Homochirality to design high-Tclead-free ferroelastic semiconductors
Source: Royal Society of Chemistry journal article supplement (doi:10.1039/d4tc00428k), 2024-01-01
Supplement: d4tc00428k1.pdf [file d4tc00428k1.pdf]

## Homochirality to design high- $T_c$ lead-free ferroelastic semiconductor

Bo-Wen Deng<sup>a</sup>, Zhi-Peng Rao<sup>a</sup>, Ming-Jing Shen<sup>a</sup>, Ke-Wei Liang<sup>c</sup>, Yang Zhu<sup>a</sup>, Zhi-Jie Wang<sup>a</sup>, Kun Ding<sup>a</sup>,

Chang-Yuan Su<sup>a</sup>, Meng-Meng Lun<sup>a</sup>, Zhi-Xu Zhang<sup>b\*</sup>, Yi Zhang<sup>b\*</sup>, Da-Wei Fu<sup>a\*</sup>

<sup>a</sup> Ordered Matter Science Research Center, Jiangsu Key Laboratory for Science and Applications of Molecular Ferroelectrics, Southeast University, Nanjing, 211189, People's Republic of China. Email: dawei@zjnu.edu.cn

<sup>b</sup> Institute for Science and Applications of Molecular Ferroelectrics, Key Laboratory of the Ministry of Education for Advanced Catalysis Materials, Zhejiang Normal University, Jinhua, 321019, People's Republic of China. Email: zhangzhixu@zjnu.edu.cn, yizhang1980@seu.edu.cn

<sup>c</sup> School of Electronic and Communication Engineering, Tianjin Normal University, Tianjin 300387, People's Republic of China.

### Experimental Measurement Methods

#### Single-crystal X-ray crystallography (SXR):

The single-crystal structure is the most direct way to determine crystal structure. X-diffraction of compounds (*R/S*-CTA)<sub>2</sub>SbCl<sub>5</sub> and TMCP<sub>2</sub>SbCl<sub>5</sub> at 293 K was performed to obtain crystallographic data of the compound mass (using Rigaku Varimax<sup>TM</sup> DW diffractometer and MoK $\alpha$  radiation ( $\lambda=0.71073\text{\AA}$ )). The crystallographic data were processed by direct methods and refined by full matrix least squares using the SHLXTL-2014 program. The non-H atoms were refined an isotropically, limiting all reflections to  $I>2\sigma(I)$ ; moreover, the rational positions of the H atoms were geometrically generated and refined with the "riding" model ( $U_{iso}(H) = 1.2 U_{eq}(C \text{ or } N)$ )

#### Differential scanning calorimetry (DSC):

The (*R/S*-CTA)<sub>2</sub>SbCl<sub>5</sub> and TMCP<sub>2</sub>SbCl<sub>5</sub> powders were sealed in an aluminum crucible to preform DSC and tested from 330 K to 440 K under nitrogen protection using netsch-214 DSC.

#### Dielectric:

Tonghui TH2828A Precision LCR Meter was used to measure the dielectric response of (*R/S*-CTA)<sub>2</sub>SbCl<sub>5</sub> and TMCP<sub>2</sub>SbCl<sub>5</sub>. The samples were pressed into sheets, coated with silver glue on both sides, and tested at 500 kHz-1 MHz frequency and 1V AC voltage.

#### Ultraviolet-visible (UV-vis) absorption:

Ultraviolet-visible (UV-vis) absorption spectroscopy measurements on (*R/S*-CTA)<sub>2</sub>SbCl<sub>5</sub> and TMCP<sub>2</sub>SbCl<sub>5</sub> (polycrystalline samples) were performed at room temperature using a Shimadzu (Tokyo, Japan) UV-2600 spectrophotometer with an ISR-2600Plus integrating sphere in the range of 200–400 nm. BaSO<sub>4</sub> was used as the 100% reflectance reference.

### **Second-harmonic generation (SHG):**

The compounds were prepared into powders with different particle sizes for SHG response testing. Temperature-varying SHG experiments were performed by using a low-divergence basic laser beam, which pulsed in Nd: YAG. The wavelength is 1064 nm, the peak power is 1.6 MW, the repetition rate is 10 Hz, and the pulse duration is 5 ns.

### **Powder X-ray Diffraction (PXRD):**

X-ray diffraction patterns of the microcrystalline compounds were characterized at room temperature using a Rigaku D/MAX diffraction system under Cu-K $\alpha$  radiation with a diffraction range of 5-50° and a step size of 0.02°. At the same time, the X-ray diffraction patterns of the samples were tested in the temperature range of 293-435 K. In conjunction with the crystallographic information files from the variable temperature X-ray powder diffraction experiments, the space groups of the crystals were simulated using the material studio software package.

### **Hirshfeld Surfaces analysis:**

Hirshfeld  $d_{norm}$  surfaces and 2D fingerprint plots surrounding inorganic anions were calculated by the CrystalExplorer software based on their SC-XRD data. Hirshfeld surfaces with  $d_{norm}$  values reveal a red-blue-white color scheme that imply the intensity of intermolecular interactions, of which the red/blue/white regions mean that intermolecular interactions are stronger/equal/weaker compared to the van der Waals forces. In 2D fingerprint plots, each point represents an individual pair ( $d_i$ ,  $d_e$ ), reflecting the distances to the nearest atom inside ( $d_i$ ) and outside ( $d_e$ ) of the Hirshfeld  $d_{norm}$  surface.

### **Density Functional Theory (DFT) Calculations:**

The band structure and partial density state were performed based on density function theory (DFT) by using the Vienna Ab-initio Simulation Package (VASP). Firstly, the crystallographic structures of compounds obtained from SC-XRD measurement were further optimized geometrically, employing the exchange-correlation interactions within the generalized gradient approximation (GGA) on the basis of the Perdew Burke Ernzerh (PBE) function. Secondly, the band structure and partial density state of optimized structures were calculated by the PBE function with considering spin-orbit coupling (SOC) and without considering SOC, respectively. Meanwhile, the plane wave cut-off energy, the force and energy convergence criterions were set to be 520 eV, 0.02 eV/Å and 10<sup>-6</sup> eV per atom, respectively, and the mesh samplings in the Brillouin zone were 1 × 1 × 2 for (R/S-CTA)<sub>2</sub>SbCl<sub>5</sub> and TMCP<sub>2</sub>SbCl<sub>5</sub>. In addition, the other parameters and convergent criteria were the default values. Finally, the post-processing analysis was performed by using VASPKIT.

### **Ferroelastic Measurement:**

The evolution of ferroelastic domains for (R-CTA)<sub>2</sub>SbCl<sub>5</sub> crystals was observed by an Olympus BX51TRF polarizing microscope equipped with temperature control INSTEC HCC602

### **Synthesis:**

The reagents and solvents designed in this experiment are analytical pure and do not require further purification.

## (TMCP)Cl

Prepare a 250 mL round bottom flask, add 0.12 mol 1,3-Dichloropropane, 0.1 mol trimethylamine alcohol solution, and 100 mL acetonitrile to the flask for mixing. Heat the mixed solution in an oil bath at 323 K for 12 hours. After the reaction is complete, perform vacuum distillation on the mixed solution to obtain a white powder. Dry the white powder in an oven at 323 K for 2 hours to obtain (TMCP)Cl.

## TMCP<sub>2</sub>SbCl<sub>5</sub> and (R/S-CTA)<sub>2</sub>SbCl<sub>5</sub>

TMCP<sub>2</sub>SbCl<sub>5</sub> and (R/S-CTA)<sub>2</sub>SbCl<sub>5</sub> were synthesized using the solvent evaporation method. Mix (TMCP)Cl, R/S-CTA, and SbCl<sub>3</sub> with a molar ratio of 4:2, dissolve them in a 37% hydrochloric acid aqueous solution, and evaporate them on a 318 K hot plate for 5 days to obtain white transparent crystals of TMCP and (R/S-CTA)<sub>2</sub>SbCl<sub>5</sub>. The room temperature powder X-ray diffraction (PXRD) patterns of TMCP<sub>2</sub>SbCl<sub>5</sub> and (R/S-CTA)<sub>2</sub>SbCl<sub>5</sub> match well with the simulated data based on the 273 K crystal structure (Fig. S1). This can prove the phase purity of TMCP<sub>2</sub>SbCl<sub>5</sub> and (R/S-CTA)<sub>2</sub>SbCl<sub>5</sub>.

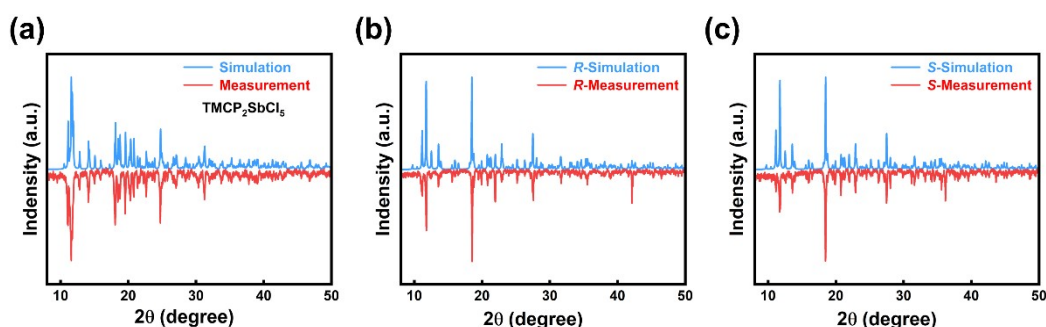

**Fig. S1** The powder XRD of (TMCP)<sub>2</sub>SbCl<sub>5</sub> (a), (R-CTA)<sub>2</sub>SbCl<sub>5</sub> (b), and (S-CTA)<sub>2</sub>SbCl<sub>5</sub> (c) with the simulated one in blue and the measurement in red.

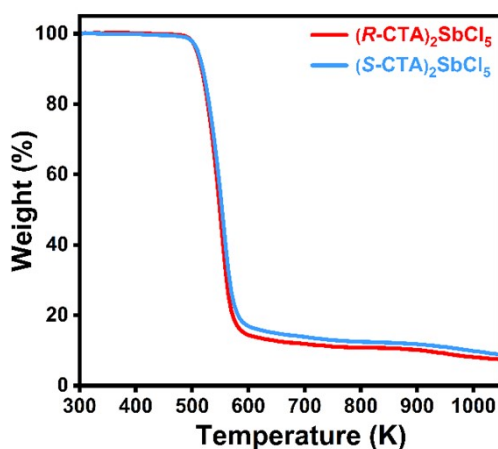

**Fig. S2** TGA curve of (R/S-CTA)<sub>2</sub>SbCl<sub>5</sub>

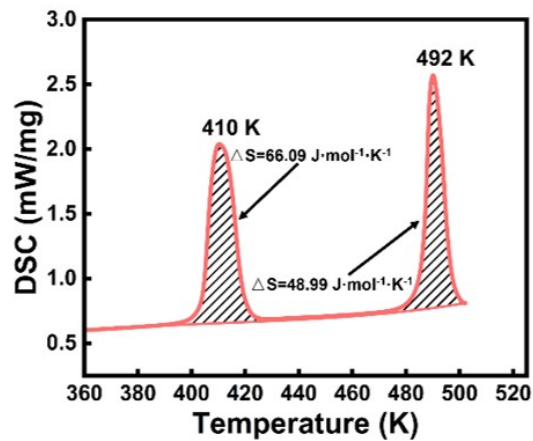

**Fig. S3** The heating DSC curve of  $(S\text{-CTA})_2\text{SbCl}_5$  (b). The enthalpy change of plastic phase transition is greater than the melting enthalpy change.

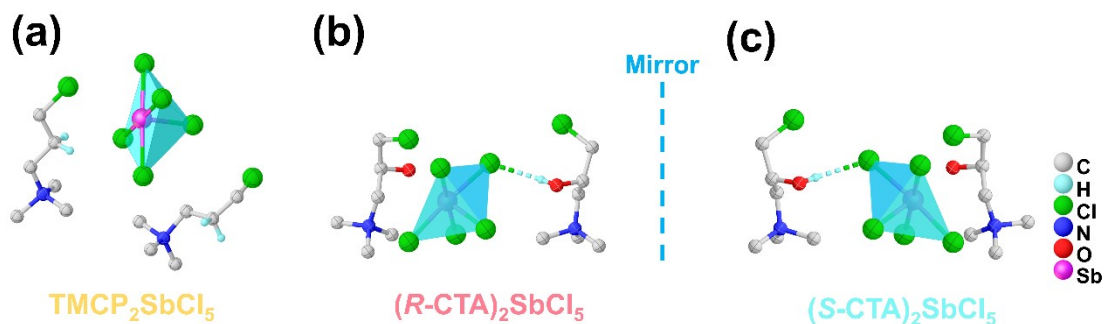

**Fig. S4** Minimum asymmetric units of  $\text{TMCP}_2\text{SbCl}_5$  (a),  $(R\text{-CTA})_2\text{SbCl}_5$  (b), and  $(S\text{-CTA})_2\text{SbCl}_5$  (c).

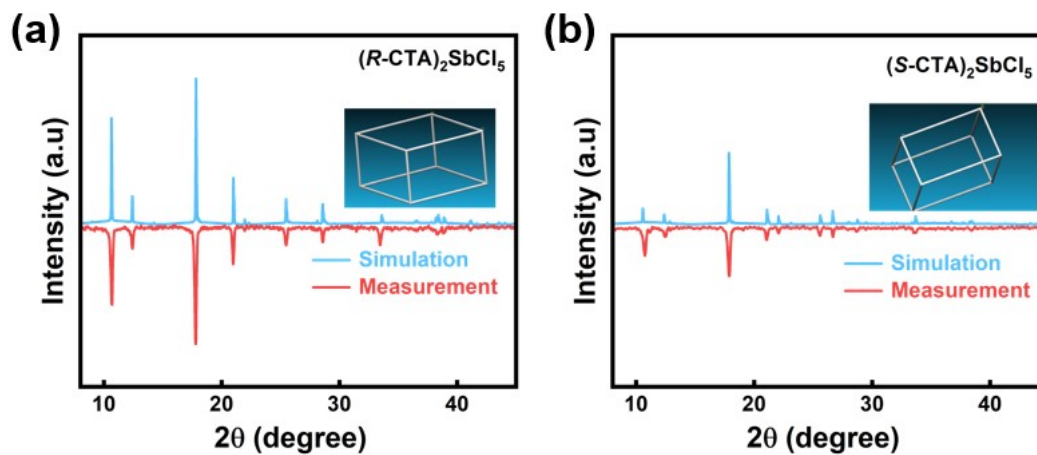

**Fig. S5** Pawley refinement of PXRD data of  $(R\text{-CTA})_2\text{SbCl}_5$  (a) and  $(S\text{-CTA})_2\text{SbCl}_5$  (b) collected at 435 K with tetragonal crystal system.

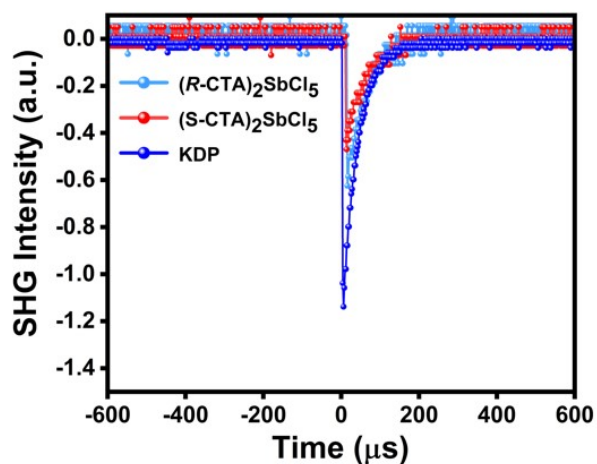

**Fig. S6** The comparison of the SHG signals of  $(R/S\text{-CTA})_2\text{SbCl}_5$  with that of standard KDP at room temperature.

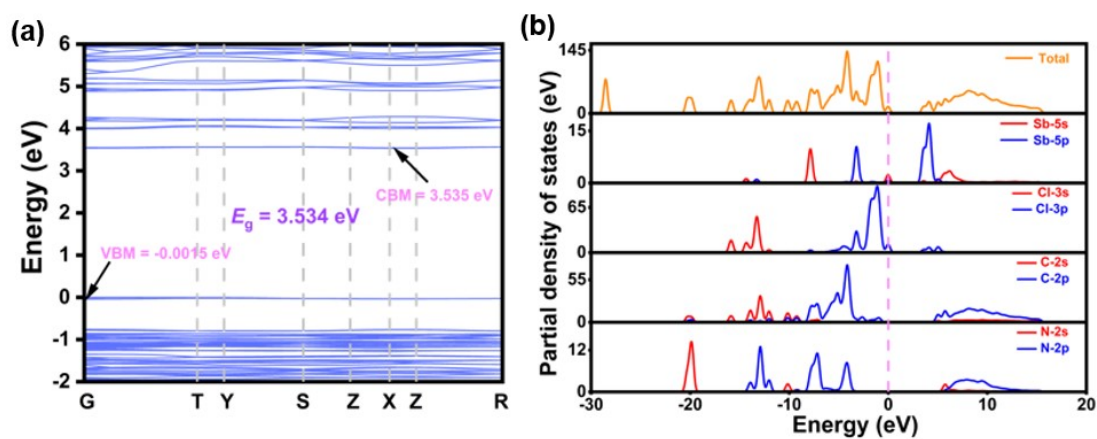

**Fig. S7** The energy-band structure (a) and the partial density of states (PDOS) (b) of  $(S\text{-CTA})_2\text{SbCl}_5$

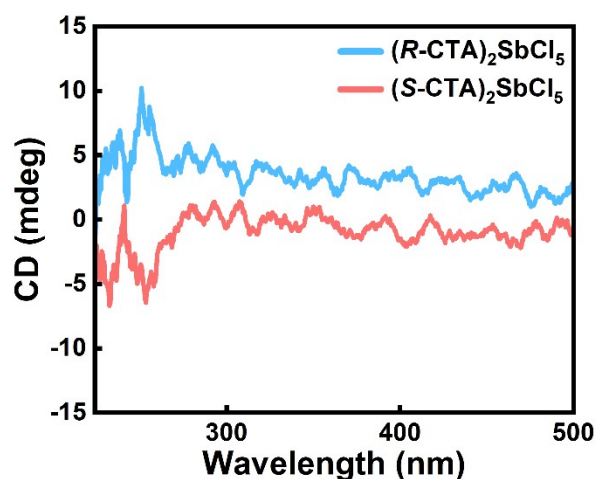

**Fig. S8** CD spectra of  $(R/S\text{-CTA})_2\text{SbCl}_5$

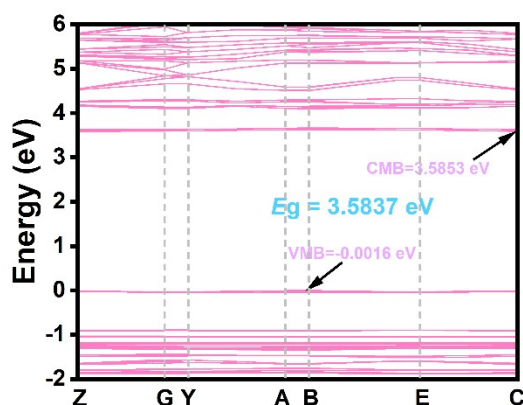

**Fig. S9** The energy-band structure of  $\text{TMCP}_2\text{SbCl}_5$

**Table S1.** Crystal data and structure refinement for  $(R/S\text{-CTA})_2\text{SbCl}_5$  at 293 K

|                             | $R\text{-CTA}_2\text{SbCl}_5$                                     | $S\text{-CTA}_2\text{SbCl}_5$                                     |
|-----------------------------|-------------------------------------------------------------------|-------------------------------------------------------------------|
| Empirical formula           | $\text{Cl}_5\text{Sb}\cdot 2(\text{C}_6\text{H}_{15}\text{ClNO})$ | $\text{Cl}_5\text{Sb}\cdot 2(\text{C}_6\text{H}_{15}\text{ClNO})$ |
| Formula weight              | 604.28                                                            | 604.28                                                            |
| Crystal system              | Orthorhombic                                                      | Orthorhombic                                                      |
| Space group                 | $P2_12_12_1$                                                      | $P2_12_12_1$                                                      |
| $a/\text{\AA}$              | 8.9032(3) $\text{\AA}$                                            | 8.9021(2) $\text{\AA}$                                            |
| $b/\text{\AA}$              | 9.5971(3) $\text{\AA}$                                            | 9.5969(2) $\text{\AA}$                                            |
| $c/\text{\AA}$              | 28.2922(8) $\text{\AA}$                                           | 28.2865(7) $\text{\AA}$                                           |
| $\alpha/^\circ$             | 90                                                                | 90                                                                |
| $\beta/^\circ$              | 90                                                                | 90                                                                |
| $\gamma/^\circ$             | 90                                                                | 90                                                                |
| Crystal size/ $\text{mm}^3$ | $0.02 \times 0.01 \times 0.01$                                    | $0.02 \times 0.01 \times 0.01$                                    |
| Volume/ $\text{\AA}^3$      | 2417.42(12) $\text{\AA}^3$                                        | 2416.59(10) $\text{\AA}^3$                                        |
| Z                           | 4                                                                 | 4                                                                 |
| F(000)                      | 1208                                                              | 1208                                                              |
| Goodness-of-fit on $F^2$    | 1.03                                                              | 1.03                                                              |
| $R_1 [I \geq 2\sigma(I)]$   | 0.032                                                             | 0.021                                                             |
| $R_2 [I \geq 2\sigma(I)]$   | 0.065                                                             | 0.048                                                             |

**Table S2.** Crystal data and structure refinement for  $\text{TMCP}_2\text{SbCl}_5$  at 293 K and 400 K

| Temperature       | 239 K                                                            | 400 K                                               |
|-------------------|------------------------------------------------------------------|-----------------------------------------------------|
| Empirical formula | $\text{Cl}_5\text{Sb}\cdot 2(\text{C}_6\text{H}_{15}\text{ClN})$ | $\text{Cl}_5\text{Sb}\cdot 2(\text{C}_6\text{ClN})$ |
| Formula weight    | 572.28                                                           | 542.05                                              |
| Crystal system    | Monoclinic                                                       | Monoclinic                                          |
| Space group       | $P2_1/c$                                                         | $P2_1/c$                                            |
| $a/\text{\AA}$    | 8.5967(4) $\text{\AA}$                                           | 8.652(4) $\text{\AA}$                               |
| $b/\text{\AA}$    | 31.8060(15) $\text{\AA}$                                         | 32.014(13) $\text{\AA}$                             |
| $c/\text{\AA}$    | 9.6375(5) $\text{\AA}$                                           | 9.671(4) $\text{\AA}$                               |
| $\alpha/^\circ$   | 90                                                               | 90                                                  |

|                                        |                          |                           |
|----------------------------------------|--------------------------|---------------------------|
| $\beta/^\circ$                         | 115.487(6)               | 116.319(9)                |
| $\gamma/^\circ$                        | 90                       | 90                        |
| Crystal size/mm <sup>3</sup>           | 0.15 × 0.1 × 0.1         | 0.11 × 0.12 × 0.13        |
| Volume/Å <sup>3</sup>                  | 2378.7(2) Å <sup>3</sup> | 2401.1(18) Å <sup>3</sup> |
| Z                                      | 4                        | 4                         |
| F(000)                                 | 1144                     | 1024.0                    |
| Goodness-of-fit on F <sup>2</sup>      | 1.04                     | 1.042                     |
| R <sub>1</sub> [ $I \geq 2\sigma(I)$ ] | 0.046                    | 0.048                     |
| R <sub>2</sub> [ $I \geq 2\sigma(I)$ ] | 0.138                    | 0.1524                    |

**Table S3.** Bond Lengths and Bond Angles for (R-CTA)<sub>2</sub>SbCl<sub>5</sub> at 293 K

| Bond lengths [Å] |             |             |           |
|------------------|-------------|-------------|-----------|
| Sb1—Cl1          | 2.6180 (11) | Cl7—C12     | 1.790 (5) |
| Sb1—Cl2          | 2.5604 (12) | O2—C11      | 1.418 (5) |
| Sb1—Cl3          | 2.5937 (10) | N2—C7       | 1.511 (5) |
| Sb1—Cl4          | 2.6993 (12) | N2—C8       | 1.488 (6) |
| Sb1—Cl5          | 2.3606 (10) | N2—C9       | 1.501 (6) |
| Cl6—C6           | 1.783 (5)   | N2—C10      | 1.514 (5) |
| O1—C5            | 1.425 (5)   | C4—C5       | 1.513 (5) |
| N1—C1            | 1.492 (6)   | C5—C6       | 1.513 (6) |
| N1—C2            | 1.467 (6)   | N1—C4       | 1.504 (5) |
| N1—C3            | 1.485 (5)   |             |           |
| Angles [°]       |             |             |           |
| Cl1—Sb1—Cl4      | 90.16 (4)   | C5—C6—Cl6   | 112.6 (3) |
| Cl2—Sb1—Cl1      | 89.00 (4)   | C7—N2—C10   | 107.1 (3) |
| Cl2—Sb1—Cl3      | 91.38 (4)   | C8—N2—C7    | 107.2 (4) |
| Cl2—Sb1—Cl4      | 176.62 (4)  | C8—N2—C9    | 110.4 (4) |
| Cl3—Sb1—Cl1      | 173.97 (4)  | C8—N2—C10   | 112.4 (3) |
| Cl3—Sb1—Cl4      | 89.11 (4)   | C9—N2—C7    | 108.2 (4) |
| Cl5—Sb1—Cl1      | 86.53 (4)   | C9—N2—C10   | 111.3 (4) |
| Cl5—Sb1—Cl2      | 88.98 (4)   | C1—N1—C4    | 110.7 (4) |
| Cl5—Sb1—Cl3      | 87.46 (4)   | C2—N1—C1    | 109.7 (5) |
| Cl5—Sb1—Cl4      | 87.70 (4)   | C2—N1—C3    | 108.2 (4) |
| C3—N1—C4         | 107.9 (3)   | C2—N1—C4    | 112.9 (4) |
| N1—C4—C5         | 118.0 (3)   | C3—N1—C1    | 107.3 (4) |
| O1—C5—C4         | 112.8 (3)   | C11—C10—N2  | 115.7 (3) |
| O1—C5—C6         | 112.1 (4)   | O2—C11—C10  | 108.7 (4) |
| C6—C5—C4         | 110.4 (3)   | O2—C11—C12  | 111.0 (4) |
| N1—C4—C5         | 118.0 (3)   | C12—C11—C10 | 110.6 (4) |
| O1—C5—C4         | 112.8 (3)   | C11—C12—Cl7 | 113.1 (3) |
| O1—C5—C6         | 112.1 (4)   | C11—C10—N2  | 115.7 (3) |
| C6—C5—C4         | 110.4 (3)   | O2—C11—C10  | 108.7 (4) |
| C12—C11—C10      | 110.6 (4)   | O2—C11—C12  | 111.0 (4) |
| C11—C12—Cl7      | 113.1 (3)   |             |           |

**Table S4.** Bond Lengths and Bond Angles for (S-CTA)<sub>2</sub>SbCl<sub>5</sub> at 293 K

| Bond lengths [Å] |            |             |           |
|------------------|------------|-------------|-----------|
| Sb1—Cl1          | 2.6178 (8) | Cl7—C12     | 1.786 (4) |
| Sb1—Cl2          | 2.5602 (9) | O2—C11      | 1.414 (4) |
| Sb1—Cl3          | 2.5926 (7) | N2—C7       | 1.490 (5) |
| Sb1—Cl4          | 2.6967 (9) | N2—C8       | 1.494 (5) |
| Sb1—Cl5          | 2.3616 (8) | N2—C9       | 1.469 (5) |
| Cl6—C6           | 1.789 (4)  | N2—C10      | 1.510 (4) |
| O1—C5            | 1.407 (4)  | C10—C11     | 1.512 (4) |
| N1—C1            | 1.506 (5)  | C11—C12     | 1.520 (5) |
| N1—C2            | 1.494 (5)  | C4—C5       | 1.518 (4) |
| N1—C3            | 1.493 (5)  | C5—C6       | 1.511 (5) |
| N1—C4            | 1.511 (4)  |             |           |
| Angles [°]       |            |             |           |
| Cl1—Sb1—Cl4      | 90.14 (3)  | C5—C6—Cl6   | 113.2 (3) |
| Cl2—Sb1—Cl1      | 88.99 (3)  | C7—N2—C8    | 107.0 (3) |
| Cl2—Sb1—Cl3      | 91.42 (3)  | C7—N2—C10   | 111.0 (3) |
| Cl2—Sb1—Cl4      | 176.59 (3) | C8—N2—C10   | 107.7 (2) |
| Cl3—Sb1—Cl1      | 173.99 (3) | C9—N2—C7    | 110.1 (4) |
| Cl3—Sb1—Cl4      | 89.11 (3)  | C9—N2—C8    | 108.2 (4) |
| Cl5—Sb1—Cl1      | 86.56 (3)  | C9—N2—C10   | 112.5 (3) |
| Cl5—Sb1—Cl2      | 88.94 (3)  | O2—C11—C10  | 113.4 (3) |
| Cl5—Sb1—Cl3      | 87.45 (3)  | C10—C11—C12 | 109.5 (3) |
| Cl5—Sb1—Cl4      | 87.72 (3)  | C11—C12—Cl7 | 112.2 (2) |
| C1—N1—C4         | 106.9 (3)  | C3—N1—C1    | 107.7 (3) |
| C2—N1—C1         | 108.7 (3)  | C3—N1—C2    | 110.2 (3) |
| C2—N1—C4         | 111.1 (3)  | C3—N1—C4    | 112.1 (3) |
| O1—C5—C4         | 109.2 (3)  | N1—C4—C5    | 115.9 (3) |
| O1—C5—C6         | 111.4 (3)  |             |           |

**Table S5.** Bond Lengths and Bond Angles for TMCP<sub>2</sub>SbCl<sub>5</sub> at 293 K

| Bond lengths [Å] |             |         |            |
|------------------|-------------|---------|------------|
| Sb1—Cl3          | 2.6774 (12) | Cl2—C12 | 1.690 (9)  |
| Sb1—Cl4          | 2.6640 (14) | N2—C7   | 1.503 (11) |
| Sb1—Cl5          | 2.5520 (13) | N2—C8   | 1.452 (10) |
| Sb1—Cl6          | 2.5619 (15) | N2—C9   | 1.445 (12) |
| Sb1—Cl7          | 2.3680 (14) | N2—C10  | 1.554 (12) |
| Cl1—C6           | 1.768 (5)   | C10—C11 | 1.442 (8)  |
| N1—C1            | 1.481 (9)   | C11—C12 | 1.447 (12) |
| N1—C2            | 1.504 (6)   | C5—C6   | 1.492 (7)  |
| N1—C3            | 1.478 (8)   | C4—C5   | 1.510 (7)  |
| N1—C4            | 1.495 (6)   |         |            |
| Angles [°]       |             |         |            |



|             |            |             |           |
|-------------|------------|-------------|-----------|
| Cl4—Sb1—Cl3 | 90.85 (5)  | C5—C6—Cl1   | 109.9 (4) |
| Cl5—Sb1—Cl3 | 177.62 (5) | C7—N2—C10   | 98.4 (7)  |
| Cl5—Sb1—Cl4 | 90.74 (5)  | C8—N2—C7    | 111.6 (7) |
| Cl5—Sb1—Cl6 | 88.10 (5)  | C8—N2—C10   | 113.3 (7) |
| Cl6—Sb1—Cl3 | 90.22 (5)  | C9—N2—C7    | 109.5 (8) |
| Cl6—Sb1—Cl4 | 176.60 (6) | C9—N2—C8    | 110.0 (8) |
| Cl7—Sb1—Cl3 | 88.47 (5)  | C9—N2—C10   | 113.5 (7) |
| Cl7—Sb1—Cl4 | 88.97 (7)  | C11—C10—N2  | 115.0 (8) |
| Cl7—Sb1—Cl5 | 89.79 (6)  | C10—C11—C12 | 117.6 (9) |
| Cl7—Sb1—Cl6 | 87.83 (7)  | C11—C12—Cl2 | 124.4 (8) |
| C1—N1—C2    | 106.8 (5)  | C4—N1—C2    | 107.8 (4) |
| C1—N1—C4    | 112.5 (5)  | C6—C5—C4    | 110.8 (5) |
| C3—N1—C1    | 112.7 (7)  | C3—N1—C4    | 109.6 (5) |
| C3—N1—C2    | 107.2 (5)  |             |           |

**Table S6.** Bond Lengths and Bond Angles for TMCP<sub>2</sub>SbCl<sub>5</sub> at 400 K

| Bond lengths [Å] |            |               |            |
|------------------|------------|---------------|------------|
| C1—N2            | 1.519 (15) | C11—N1        | 1.53 (2)   |
| C1A—N2           | 1.520 (18) | C12—N1        | 1.44 (2)   |
| C2—N2            | 1.534 (13) | C5A—C8A       | 1.47 (2)   |
| C2A—N2           | 1.539 (16) | C5A—Cl5A      | 1.800 (17) |
| C3—N2            | 1.519 (15) | C6A—C8A       | 1.483 (14) |
| C3A—N2           | 1.522 (17) | C6A—N1A       | 1.510 (19) |
| C4—C9            | 1.468 (13) | C10A—N1A      | 1.49 (2)   |
| C4—N2            | 1.505 (11) | C11A—N1A      | 1.53 (2)   |
| C7—C9            | 1.521 (14) | C12A—N1A      | 1.44 (2)   |
| C7—Cl2           | 1.754 (10) | Cl1—Sb1       | 2.654 (2)  |
| C5—C8            | 1.468 (19) | Cl3—Sb1       | 2.548 (2)  |
| C5—Cl5           | 1.797 (15) | Cl4—Sb1       | 2.665 (2)  |
| C6—C8            | 1.498 (9)  | Cl6—Sb1       | 2.352 (2)  |
| C6—N1            | 1.513 (17) | Cl7—Sb1       | 2.541 (2)  |
| C10—N1           | 1.486 (19) |               |            |
| Angles [°]       |            |               |            |
| C9—C4—N2         | 111.3 (9)  | C12—N1—C10    | 108.0 (16) |
| C9—C7—Cl2        | 105.6 (7)  | C12—N1—C11    | 116.0 (16) |
| C4—C9—C7         | 108.7 (9)  | C8A—C5A—Cl5A  | 125 (3)    |
| C1—N2—C2         | 104.6 (14) | C8A—C6A—N1A   | 115 (2)    |
| C1A—N2—C2A       | 112.3 (14) | C5A—C8A—C6A   | 120 (3)    |
| C1A—N2—C3A       | 113.1 (13) | C6A—N1A—C11A  | 117 (2)    |
| C3—N2—C1         | 112.4 (16) | C10A—N1A—C6A  | 116 (2)    |
| C3—N2—C2         | 103.8 (14) | C10A—N1A—C11A | 106 (2)    |
| C3A—N2—C2A       | 112.1 (14) | C12A—N1A—C6A  | 99 (2)     |
| C4—N2—C1         | 121.2 (17) | C12A—N1A—C10A | 104 (3)    |
| C4—N2—C1A        | 102 (2)    | C12A—N1A—C11A | 114 (3)    |
| C4—N2—C2         | 107.4 (13) | Cl1—Sb1—Cl4   | 91.08 (8)  |

---

|            |            |             |            |
|------------|------------|-------------|------------|
| C4—N2—C2A  | 99 (2)     | Cl3—Sb1—Cl1 | 177.16 (9) |
| C4—N2—C3   | 106.0 (15) | Cl3—Sb1—Cl4 | 89.97 (8)  |
| C4—N2—C3A  | 118 (3)    | Cl6—Sb1—Cl1 | 89.01 (10) |
| C8—C5—Cl5  | 120.1 (12) | Cl6—Sb1—Cl3 | 88.37 (11) |
| C8—C6—N1   | 111.7 (15) | Cl6—Sb1—Cl4 | 88.63 (8)  |
| C5—C8—C6   | 118.8 (14) | Cl6—Sb1—Cl7 | 89.85 (9)  |
| C6—N1—C11  | 114.5 (13) | Cl7—Sb1—Cl1 | 90.62 (8)  |
| C10—N1—C6  | 113.2 (13) | Cl7—Sb1—Cl3 | 88.27 (9)  |
| C10—N1—C11 | 104.7 (14) | Cl7—Sb1—Cl4 | 177.70 (8) |
| C12—N1—C6  | 100.7 (14) |             |            |

---
